# Supplementary material
Source: HighWire-hosted journal article supplement (https://oem.bmj.com/content/77/7/496)
Supplement: inline-supplementary-material-1 [file inline-supplementary-material-1.pdf]

**Supplementary file 1: Search strategy under OvidSP in databases Embase and Medline**

- Embase 1974 –
- Ovid Medline(R) Epub Ahead of Print, In-Process & Other Non-Indexed Citations, Daily and Versions(R)

January 25, 2019:

**Concept n° 1: Occupation, n = 87129 from Medline and 111535 from Embase**

work.sh. or (occupations.sh and socioeconomic factors.sh) OR

(cosmetologists or "employment status" or "female farmers" or "female physiotherapists" or "military women" or "flight attendants" or "fabrication worker\*" or "occupational fatigue" or "maternal occupation" or "maternal work" or "maternity leave" or "physical workload" or "pregnant workers" or "work in pregnancy" or "work and pregnancy" or "employment in pregnancy" or ("physical load" adj5 work) or "work stress" or "shift work" or shiftwork or "duty hours" or "working women" or workplace or "work-related stress" or "job strain").ti. OR (pregnancy and (outcome\* or "complication\*") and ("resident physician\*" or "of physicians" or physiotherapists)).ti OR (industry adj5 (work or "spontaneous abortion" or "female employment")).ti OR (employment adj4 ("pregnancy outcome" or ((physical or psychological) adj2 demand\*))).ti OR ((job or jobs) and (adjustment or control or style or stressors or "physical demands")).ti. OR ((work or working) and (activity or hazards or leave or conditions or characteristics or risk or schedule\* or hours or night or heavy or stress or determinant\*)).ti. OR ((occupational or occupation) and (characteristics or exposure\* or factors or hazards or lifting or "physical activity" or military or effect\* or risk\*)).ti.

OR

((work or working) and (physical activit\* or night shift\* or standing)).ti,ab. OR ("employed in heavy work" or "job strain" or "job stress" or "night work" or "physical work" or "physical workload" or (employment adj7 "physical activity") or "shift work" or "work activity" or "work characterization" or "work factors" or "work stress" or "work\* conditions" or "working during pregnancy" or "occupational activity" or ("exposure of pregnant women" and workers) or (("physical activity" or "heavy lifting") and occupational)).ti,ab.

**Concept n° 2: Pregnancy, n = 309511 from Medline and 360917 from Embase**

Abortion, Spontaneous/et [Etiology] OR

("birth and infant health" or pregnan\* or "birth outcome\*" or "birth outcome\*" or "female reproducti\*" or "perinatal outcome" or "reproductive health" or "reproductive hazard\*" or (reproductive adj5 disorders) or "reproductive outcome\*" or "maternity disturbances" or "spontaneous abortion\*" or miscarriage\* or "missed abortion" or "fetal loss" or "preterm labor" or "preterm delivery" or "preterm premature" or prematurity or "premature labor" or "premature birth" or "gestational age" or "birth weight" or birthweight\* or "intrauterine growth retardation" or "gestational hypertension" or "pre-eclampsia" or preeclampsia or "birth defect\*" or "congenital malformation\*").ti.

OR

("low birth weight" or "pregnancy outcome\*" or "pregnancy-related health outcome\*" or "preterm birth" or "fetal loss" or (adverse\* and pregnancy) or ("at risk pregnancy" and "prenatal leave")).ti,ab.

**Combination of concept n° 1: Occupation AND concept no 2: Pregnancy:**

**N = 1686 from Medline and 1667 from Embase**

**N = 2156 after exclusion of duplicates**
